# Supplementary material for: Synthesis of different manganese tungstate nanostructures for enhanced charge-storage applications: theoretical support for experimental findings
Source: Royal Society of Chemistry journal article supplement (doi:10.1039/d2cp02596e), 2022-01-01
Supplement: d2cp02596e1.pdf [file d2cp02596e1.pdf]

## Supplementary Materials

### Synthesis of Different Manganese Tungstate Nanostructures for Enhanced Charge Storage Application: Theoretical support of the Experimental Finding

K. Sardar<sup>1</sup>, S. Thakur<sup>1</sup>, A. Das<sup>1</sup>, N. Besra<sup>2</sup>, D. Banerjee<sup>3</sup>, G. Majumdar<sup>4</sup> and K. K. Chattopadhyay<sup>1,2,\*</sup>

<sup>1</sup>*School of Materials Science and Nanotechnology,  
Jadavpur University, Kolkata 700032, India.*

<sup>2</sup>*Department of Physics, Jadavpur University, Kolkata 700032, India*

<sup>3</sup>*Faculty of Engineering and Computing Sciences  
Teerthanker Mahaveer University Moradabad, UP 244001*

<sup>4</sup>*Department of Mechanical Engineering,  
Jadavpur University, Kolkata 700032, India.*

**Table S1: Values of equivalent circuit components.**

| Component                                   | Value                        |              |                              |
|---------------------------------------------|------------------------------|--------------|------------------------------|
|                                             | MWO24                        | MWO18        | MWO12                        |
| <b>R<sub>1</sub> (ohm)</b>                  | <b>0.51</b>                  | <b>1.18</b>  | <b>2.36</b>                  |
| <b>R<sub>2</sub> (ohm)</b>                  | <b>1.01</b>                  | <b>1.34</b>  | <b>1.50</b>                  |
| <b>R<sub>3</sub> (ohm)</b>                  | <b>1.55</b>                  | <b>26.97</b> | <b>2.99</b>                  |
| <b>W<sub>1</sub> (ohm S<sup>-1/2</sup>)</b> | <b>45.49</b>                 | <b>59.7</b>  | <b>55.22</b>                 |
| <b>W<sub>2</sub> (ohm S<sup>-1/2</sup>)</b> | <b>0.86</b>                  | <b>3.01</b>  | <b>2.24</b>                  |
| <b>C<sub>1</sub> (F)</b>                    | <b>0.152×10<sup>-3</sup></b> | <b>1.514</b> | <b>0.129×10<sup>-3</sup></b> |
| <b>C<sub>2</sub> (F)</b>                    | <b>0.117</b>                 | <b>0.079</b> | <b>0.912</b>                 |
| <b>C<sub>3</sub> (F)</b>                    | <b>0.99</b>                  | <b>2.87</b>  | <b>0.62</b>                  |

**Table S2: Electrochemical performance comparison:**

| Electrode material                                      | Electrolyte                           | Specific capacitance                                                                          | Potential window         | Cycling stability              | Ref.             |
|---------------------------------------------------------|---------------------------------------|-----------------------------------------------------------------------------------------------|--------------------------|--------------------------------|------------------|
| <b>MnWO<sub>4</sub>/RGO</b>                             | 6 M KOH                               | 288 Fg <sup>-1</sup> at 5 mV s <sup>-1</sup>                                                  | -0.35 to 0.55 V          | 14.9% after 6000 cycles        | 1                |
| <b>MnWO<sub>4</sub></b>                                 | 1 M Na <sub>2</sub> SO <sub>4</sub>   | 386 Fg <sup>-1</sup> at 5 mVs <sup>-1</sup>                                                   | 0 to 1 V                 | 90% after 2000 cycles          | 2                |
| <b>MnWO<sub>4</sub></b>                                 | 1 M KOH                               | 295 Fg <sup>-1</sup> at 5 mVs <sup>-1</sup>                                                   | -0.2 to 0.6 V            | > 100% after 3000 cycles       | 3                |
| <b>MnWO<sub>4</sub> micro flower</b>                    | 1 M Na <sub>2</sub> SO <sub>4</sub>   | 324 Fg <sup>-1</sup> at 1 mA cm <sup>-2</sup>                                                 | 0 to 1 V                 | 93% after 8000                 | 4                |
| <b>MnWO<sub>4</sub> (using DNA scaffold)</b>            | 0.1 M Na <sub>2</sub> SO <sub>4</sub> | 34 Fg <sup>-1</sup> at 0.5 mA cm <sup>-2</sup>                                                | 0 to 1 V                 | -                              | 5                |
| <b>MnWO<sub>4</sub> (using CTAB)</b>                    | 1 M H <sub>2</sub> SO <sub>4</sub>    | 27 Fg <sup>-1</sup> at 5 mVs <sup>-1</sup> and 16 Fg <sup>-1</sup> at 1.3 mA cm <sup>-2</sup> | -0.2 to 1 V and 0 to 1 V | increased after 1000 cycles    | 6                |
| <b>MnWO<sub>4</sub>@aCNT</b>                            | 1 M KOH                               | 542.18 Fg <sup>-1</sup> at 2 mVs <sup>-1</sup>                                                | -0.1 to 0.6 V            | Above 100% after 15,000 cycles | 7                |
| <b>MnWO<sub>4</sub></b>                                 | 0.1 M NaOH                            | 199 Fg <sup>-1</sup> at 2 mVs <sup>-1</sup>                                                   | 0 to 0.5 V               | 62% after 1200 cycles          | 8                |
| <b>WO<sub>3</sub>-RGO composite</b>                     | 0.5 M H <sub>2</sub> SO <sub>4</sub>  | 495 Fg <sup>-1</sup> at 1 Ag <sup>-1</sup>                                                    | -0.4 to 0.3 V            | 87.5% after 1000 cycles        | 9                |
| <b>WO<sub>3</sub></b>                                   | 0.5 M H <sub>2</sub> SO <sub>4</sub>  | 319.26 Fg <sup>-1</sup> at 0.7 Ag <sup>-1</sup>                                               | -0.41 to 0 V             | 83.2% after 6000 cycles        | 10               |
| <b>WO<sub>3</sub></b>                                   | 1 M Na <sub>2</sub> SO <sub>4</sub>   | 266 Fg <sup>-1</sup> at 10 mVs <sup>-1</sup>                                                  | -0.7 to 0.4 V            | 81% after 1000 cycles          | 11               |
| <b>WO<sub>3</sub>-WO<sub>3</sub>·0.5 H<sub>2</sub>O</b> | 0.5 M H <sub>2</sub> SO <sub>4</sub>  | 290 Fg <sup>-1</sup> at 25 mVs <sup>-1</sup>                                                  | -0.6 to 0.2 V            | 72% after 100 cycles           | 12               |
| <b>MnWO<sub>4</sub></b>                                 | <b>KOH</b>                            | <b>455.07 Fg<sup>-1</sup> at 2 mVs<sup>-1</sup></b>                                           | <b>-0.1 to 0.6 V</b>     | <b>94% after 10,000 cycles</b> | <b>This work</b> |

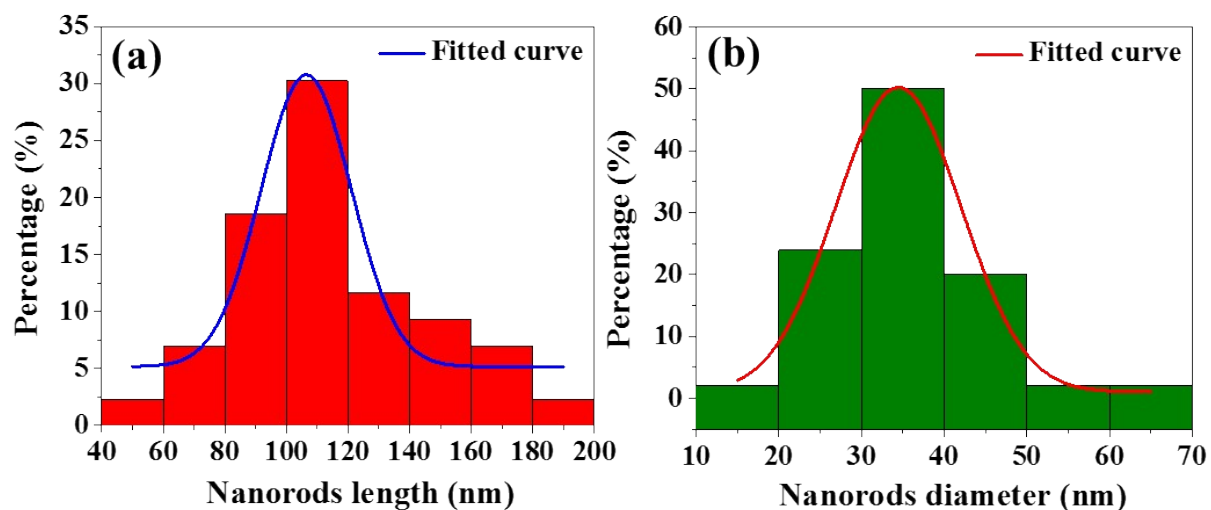

**Fig. S1:** Percentage distribution of (a) rod length and (b) rod diameter of MWO24 from TEM analysis.

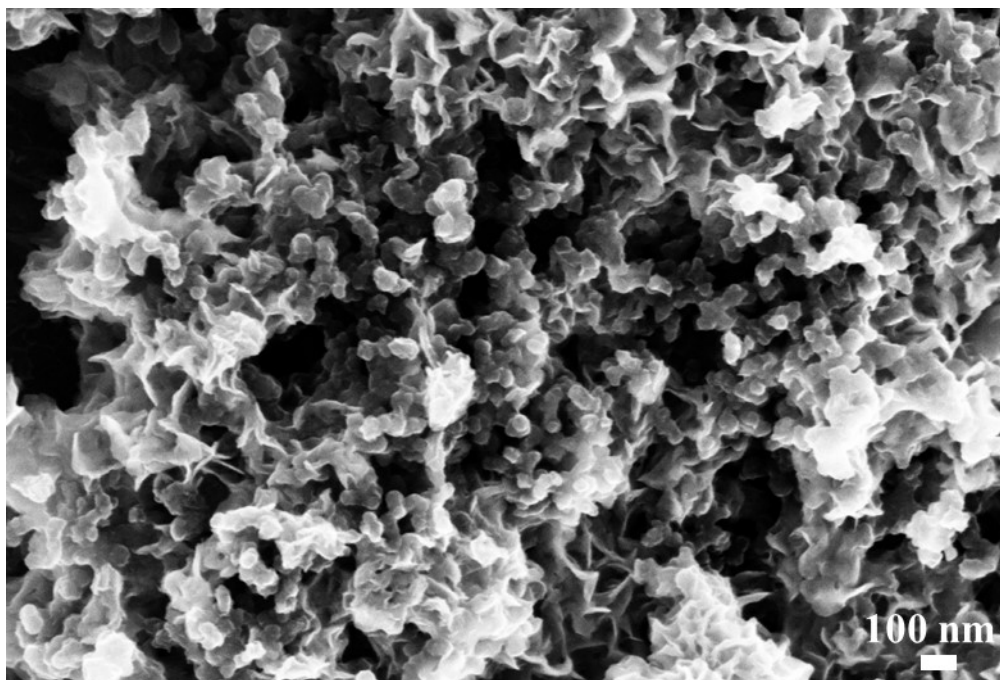

**Fig. S2:** FESEM image of MWO24 electrode after 10000 cycles.

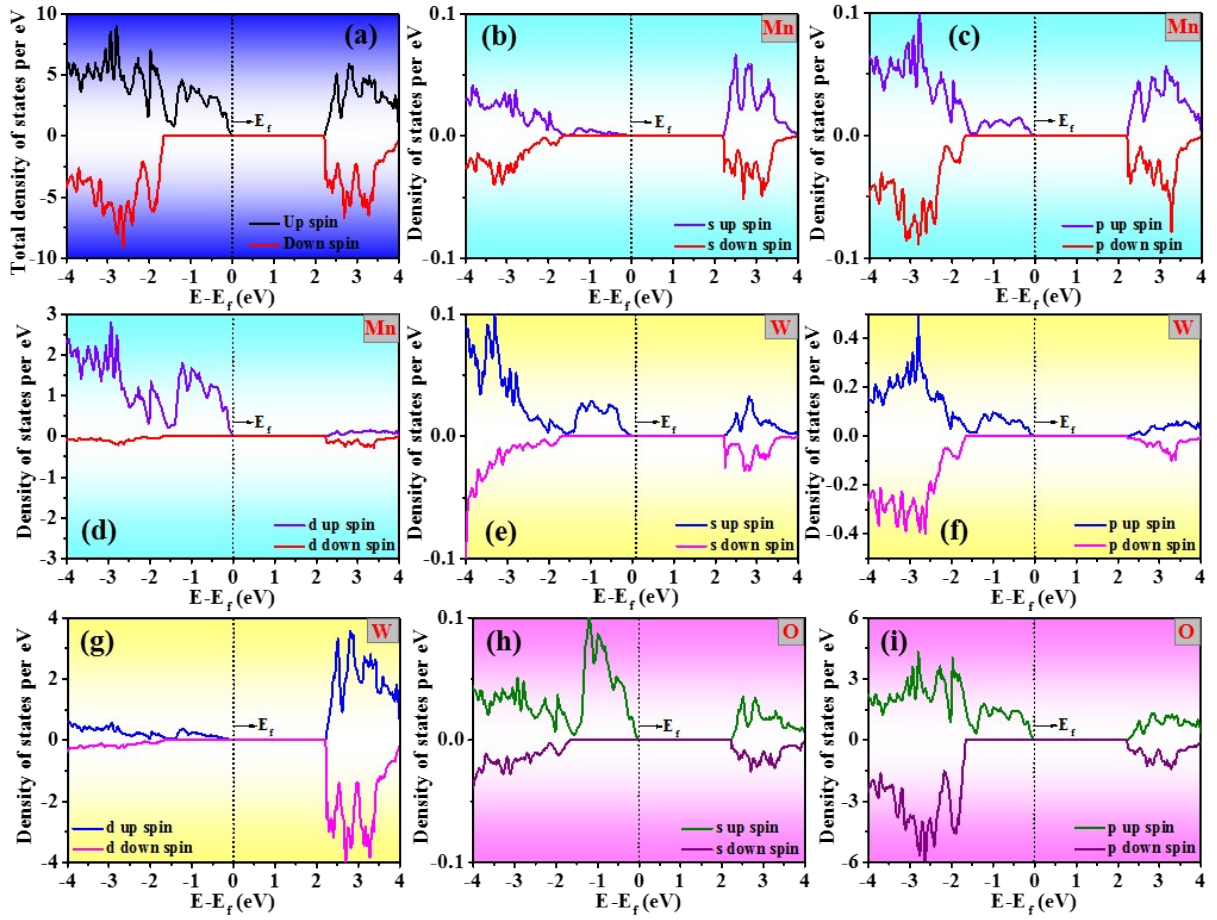

**Fig. S3:** (a) Total density of states (TDOS) for (-111) surface of MnWO<sub>4</sub>, Partial density of state (PDOS) [(-111) surface of MnWO<sub>4</sub>] for (b) Mn s orbital, (c) Mn p orbital, (d) Mn d orbital, (e) W s orbital, (f) W p orbital, (g) W d orbital (h) O s orbital and (i) O 2p orbital in 3D configuration. The Fermi level is indicated by the dotted line.

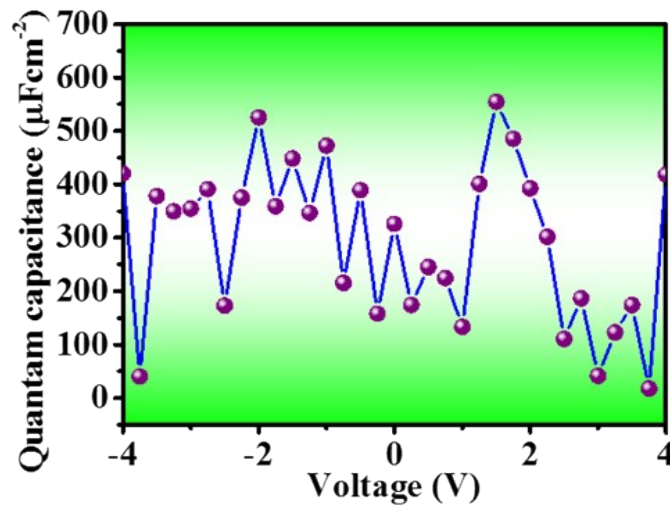

**Fig. S4:** Variation of quantum capacitance of MnWO<sub>4</sub> surface as a function of voltage using DFT D3-BJ method.

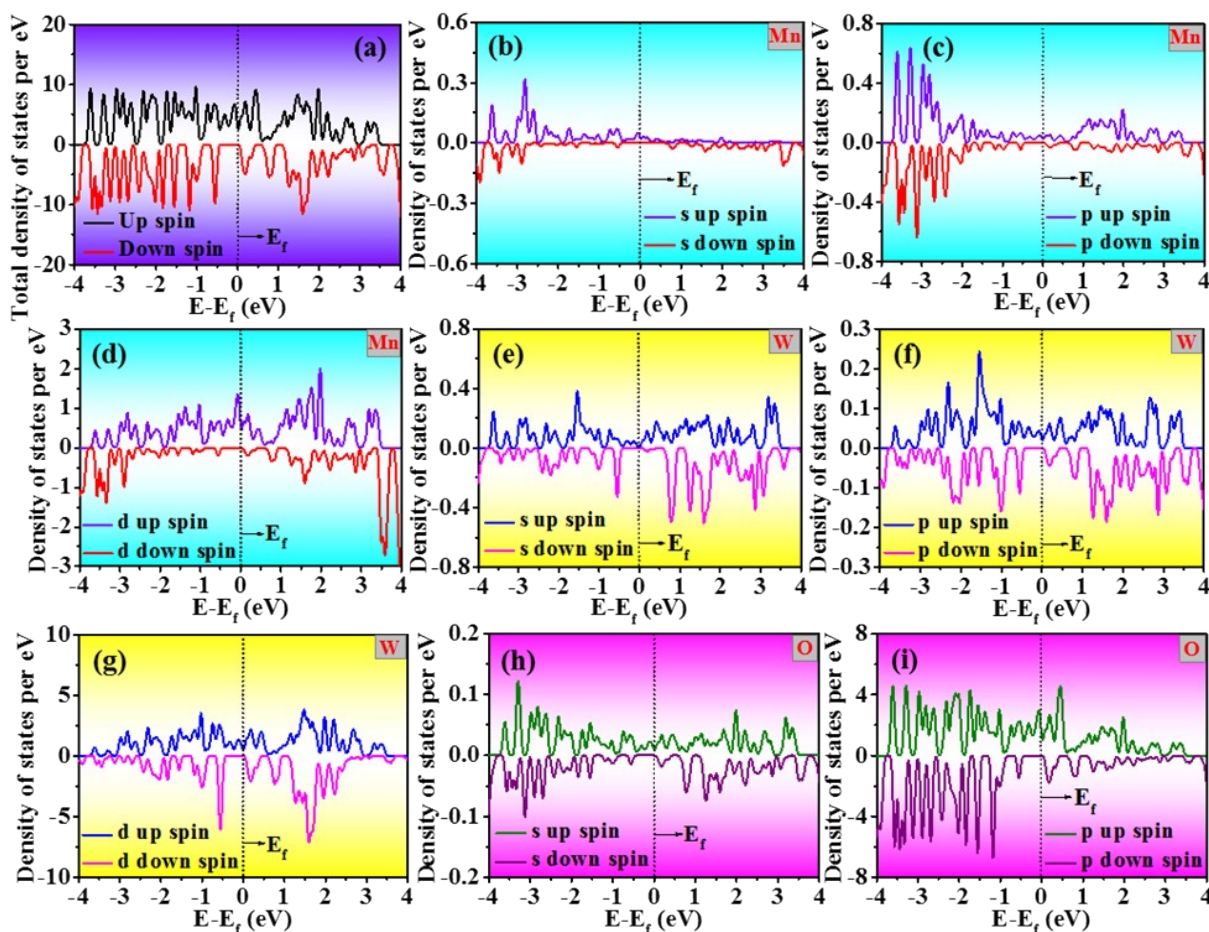

**Fig. S5:** (a) Total density of states (TDOS) for (-111) surface of MnWO<sub>4</sub>, Partial density of state (PDOS) [(-111) surface of MnWO<sub>4</sub>] for (b) Mn s orbital, (c) Mn p orbital, (d) Mn d orbital, (e) W s orbital, (f) W p orbital, (g) W d orbital (h) O s orbital and (i) O 2p orbital in 2D configuration (using DFT D3-BJ method). The Fermi level is indicated by the dotted line.

## References

1. J. Tang, J. Shen, N. Li, and M. Ye, *J. Alloys Compd.*, 2016, **666**, 15-22.
2. J. Yesuraj, E. Elanthamilan, B. Muthuraaman, S. A. Suthanthiraraj, and J. P. Merlin, *J. Electron. Mater.*, 2019, **48**, 7239-7249.
3. F. Li, X. Xu, J. Huo, and W. Wang, *Mater. Chem. Phys.*, 2015, **167**, 22-27.

4. B. G. S. Raj, J. Acharya, M. K. Seo, M. S. Khil, H. Y. Kim, and B. S. Kim, *Int. J. Hydrog. Energy*, 2019, **44**, 10838-10851.
5. U. Nithiyantham, S. R. Ede, T. Kesavan, P. Ragupathy, M. D. Mukadam, S. M. Yusuf, and S. Kundu, *RSC adv.*, 2014, **4**, 38169-38181.
6. S. Saranya, S. T. Senthilkumar, K. V. Sankar, and R. K. Selvan, *J. Electroceramics*, 2012, **28**, 220-225.
7. K. Sardar, S. Thakur, S. Maiti, N. Besra, P. Bairi, K. Chanda, G. Majumdar, and K. K. Chattopadhyay, *Dalton Trans.*, 2021, **50**, 5327-5341.
8. K. K. Naik, A. S. Gangan, A. Pathak, B. Chakraborty, S. K. Nayak, and C. S. Rout, *ChemistrySelect*, 2017, **2**, pp.5707-5715.
9. J. Chu, D. Lu, X. Wang, X. Wang, and S. Xiong, *J. Alloys Compd.*, 2017, **702**, 568-572.
10. S. Yao, F. Qu, G. Wang, and X. Wu, *J. Alloys Compd.*, 2017, **724**, 695-702.
11. N. M. Shinde, A. D. Jagadale, V. S. Kumbhar, T. R. Rana, J. Kim, and C. D. Lokhande, *Korean J. Chem. Eng.*, 2015, **32**, 974-979.
12. K. H. Chang, C. C. Hu, C. M. Huang, Y. L. Liu, and C. I. Chang, *J. Power Sources*, 2011, **196**, 2387-2392.
